# Supplementary material for: Influence of spacer length and rigidity on properties of phosphonium polymers and on their supramolecular assembly with a conjugated polyelectrolyte
Source: Royal Society of Chemistry journal article supplement (doi:10.1039/c4tc02576h), 2015-01-01
Supplement: c4tc02576h1.pdf [file c4tc02576h1.pdf]

### Electronic Supplementary Information

#### Influence of Spacer Length and Rigidity on Properties of Phosphonium Polymers and on their Supramolecular Assembly with a Conjugated Polyelectrolyte

Xiaoyan Yang, Catherine A. Conrad, Wang Wan, Monte S. Bedford, Longyu Hu, George Chumanov and Rhett C. Smith\*

*Department of Chemistry and Center for Optical Materials Science and Engineering Technologies (COMSET),  
Clemson University, Clemson, SC 29634*

Email: [rhett@clemson.edu](mailto:rhett@clemson.edu)

#### List of Supporting Information Figures:

- Figure S1** Proton NMR spectrum of **LX1**
- Figure S2** Proton NMR spectrum of **LX2**
- Figure S3** Proton NMR spectrum of **LX3**
- Figure S4** Proton NMR spectrum of **LX4**
- Figure S5** Proton NMR spectrum of **LX5**
- Figure S6** Proton NMR spectrum of **LX8**
- Figure S7** Proton NMR spectrum of **LXPh**
- Figure S8** Proton NMR spectrum of **Pc12**
- Figure S9** Proton NMR spectrum of **Pc12-100**
- Figure S10** Phosphorous-31 NMR of compound **LX1** ((CD<sub>3</sub>)<sub>2</sub>SO, 121 MHz)
- Figure S11** Phosphorous-31 NMR of compound **LX2** ((CD<sub>3</sub>)<sub>2</sub>SO, 121 MHz)
- Figure S12** Phosphorous-31 NMR of compound **LX3** ((CD<sub>3</sub>)<sub>2</sub>SO, 121 MHz)
- Figure S13** Phosphorous-31 NMR of compound **LX4** ((CD<sub>3</sub>)<sub>2</sub>SO, 121 MHz)
- Figure S14** Phosphorous-31 NMR of compound **LX5** ((CD<sub>3</sub>)<sub>2</sub>SO, 121 MHz)
- Figure S15** Phosphorous-31 NMR of compound **LX8** ((CD<sub>3</sub>)<sub>2</sub>SO, 121 MHz)
- Figure S16** Phosphorous-31 NMR of compound **LXPh** ((CD<sub>3</sub>)<sub>2</sub>SO, 121 MHz)
- Figure S17** TGA of **LX** polymers
- Figure S18** DSC of **LX** polymers
- Figure S19.** X-ray Powder Diffraction of polymers.
- Figure S20.** AFM (5×5 μm)
- Figure S21.** AFM (1×1 μm)

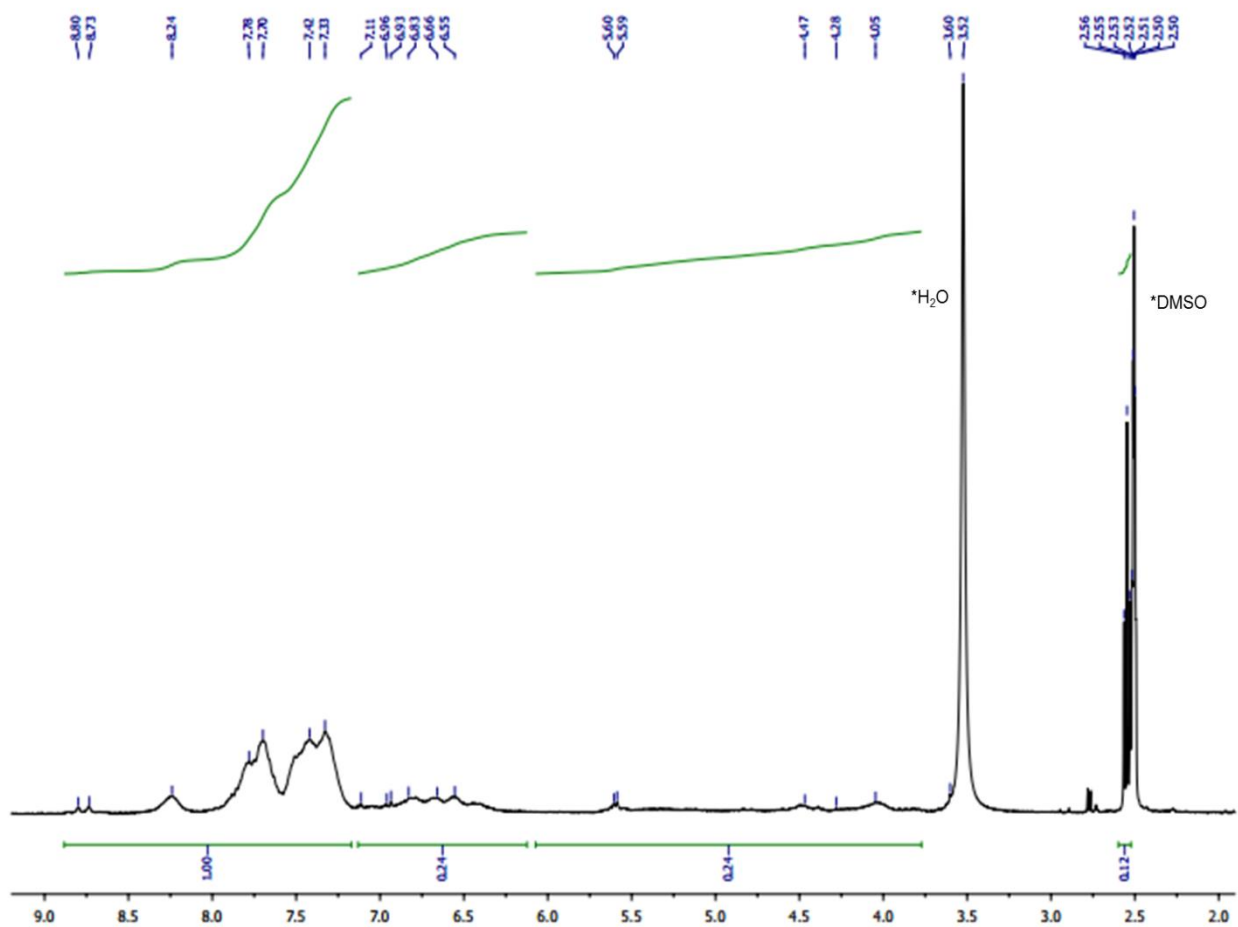

**Figure S1.** Proton NMR spectrum of **LX1** ( $(\text{CD}_3)_2\text{SO}$ , 300 MHz). Peak marked with an asterisk correspond to solvent signals.

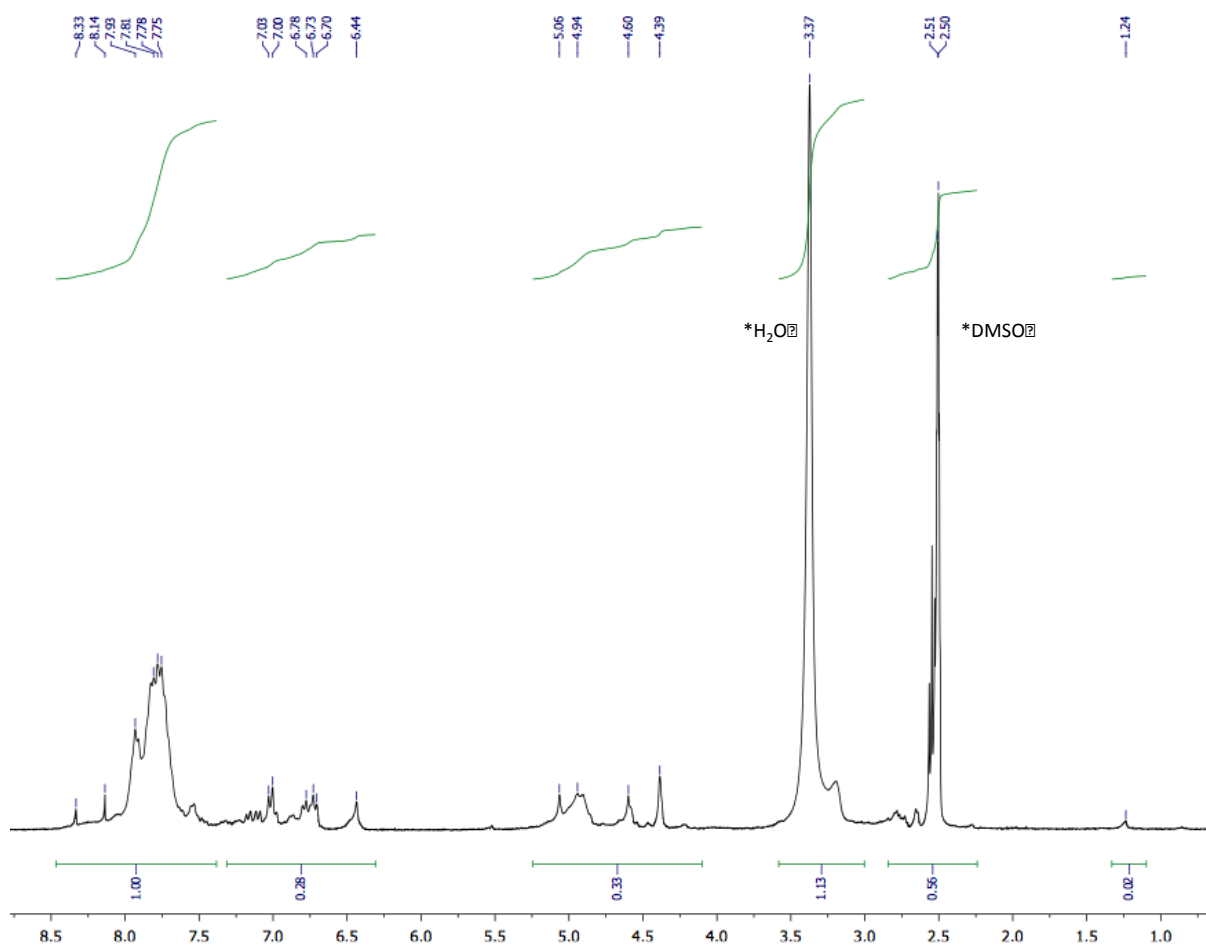

**Figure S2.** Proton NMR spectrum of **LX2** ( $(\text{CD}_3)_2\text{SO}$ , 300 MHz). Peak marked with an asterisk correspond to solvent signals.

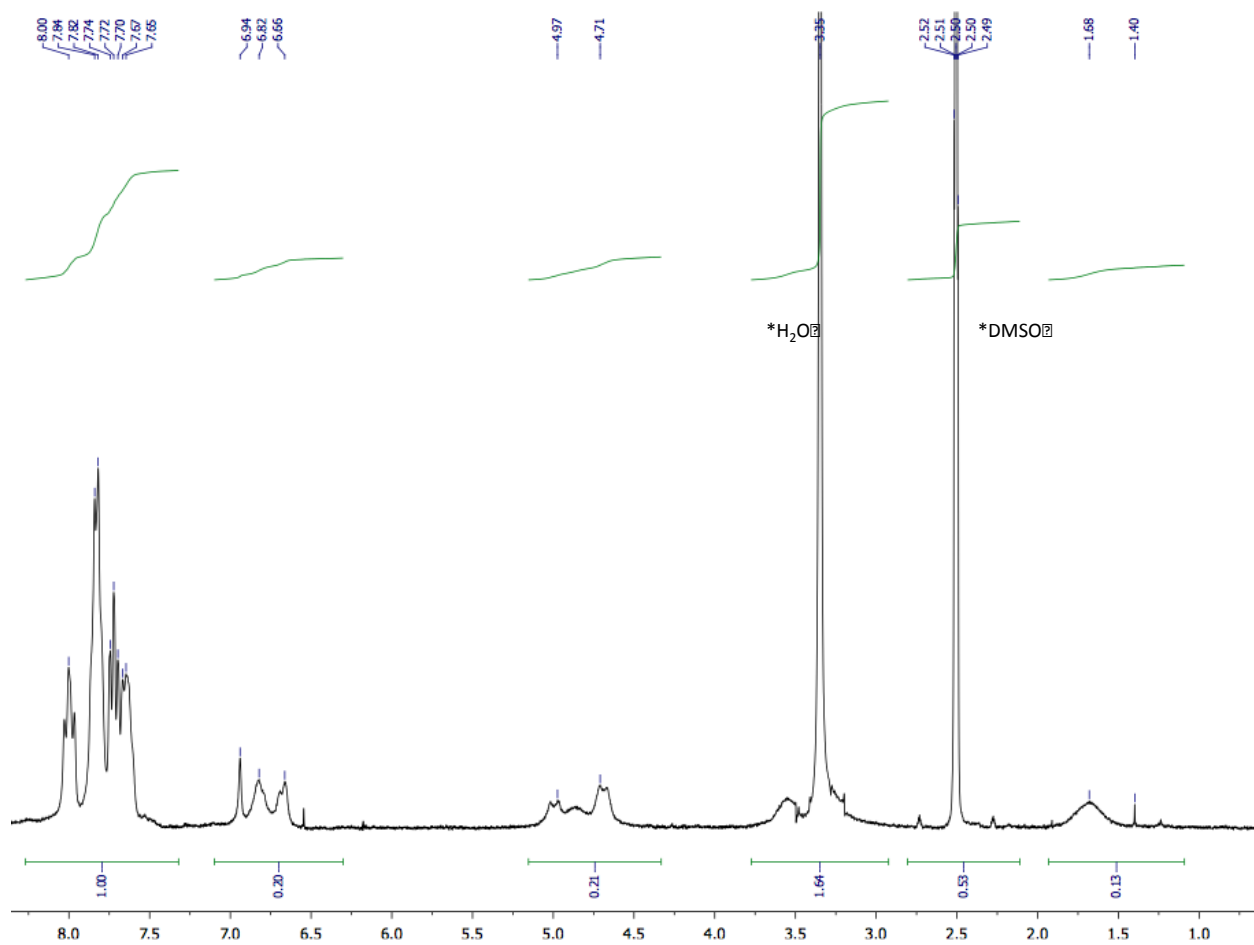

**Figure S3.** Proton NMR spectrum of **LX3** ( $(\text{CD}_3)_2\text{SO}$ , 300 MHz). Peak marked with an asterisk correspond to solvent signals.

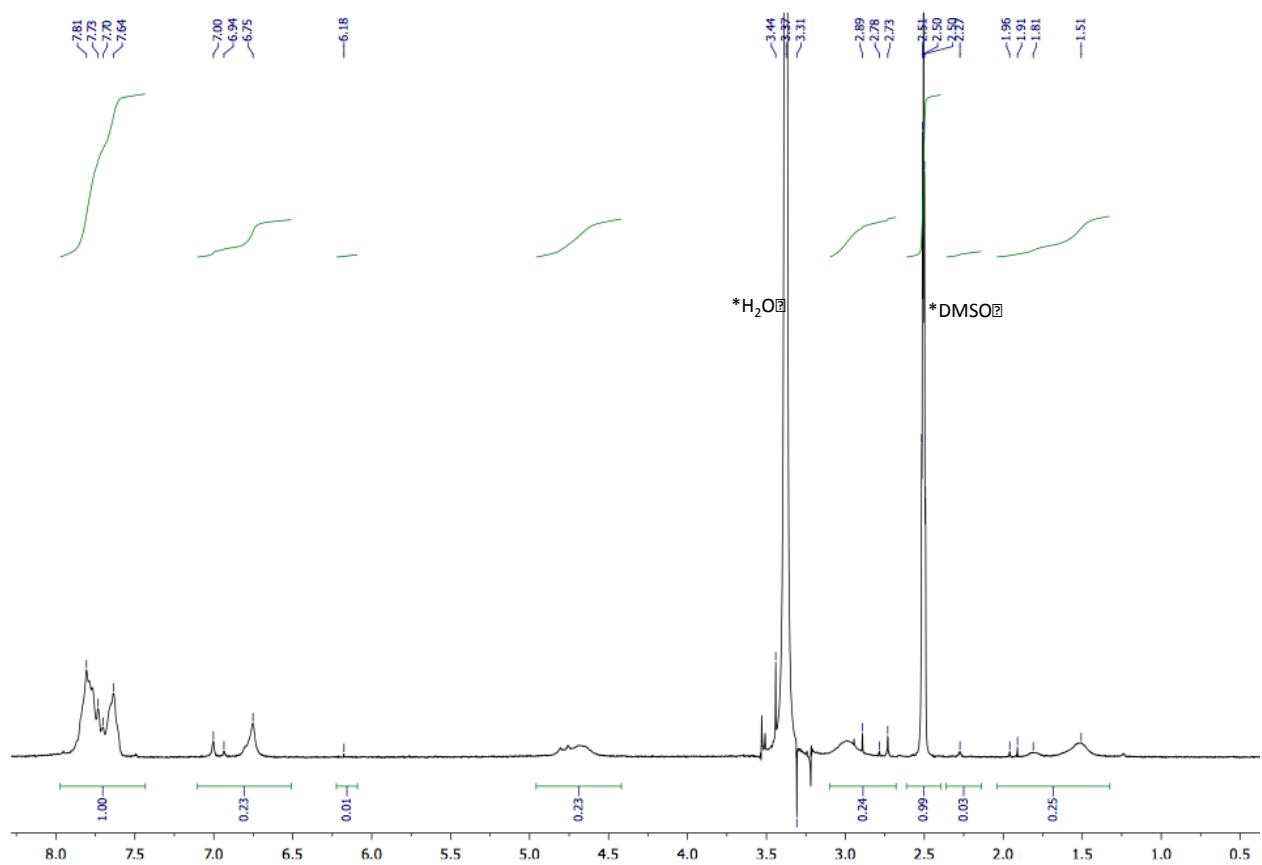

**Figure S4.** Proton NMR spectrum of **LX4** ( $(\text{CD}_3)_2\text{SO}$ , 300 MHz). Peak marked with an asterisk correspond to solvent signals.

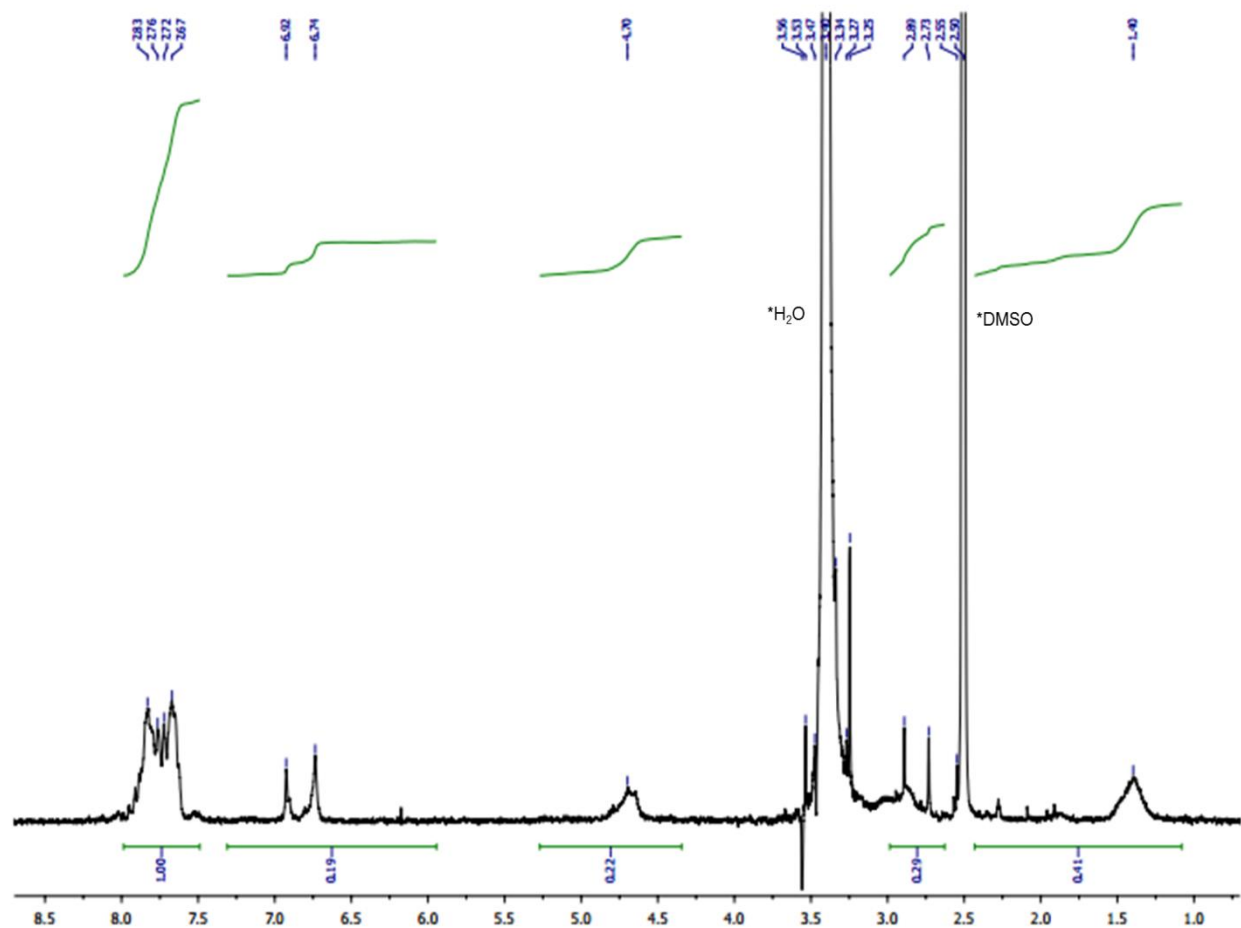

**Figure S5.** Proton NMR spectrum of **LX5** ( $(\text{CD}_3)_2\text{SO}$ , 300 MHz). Peak marked with an asterisk correspond to solvent signals.

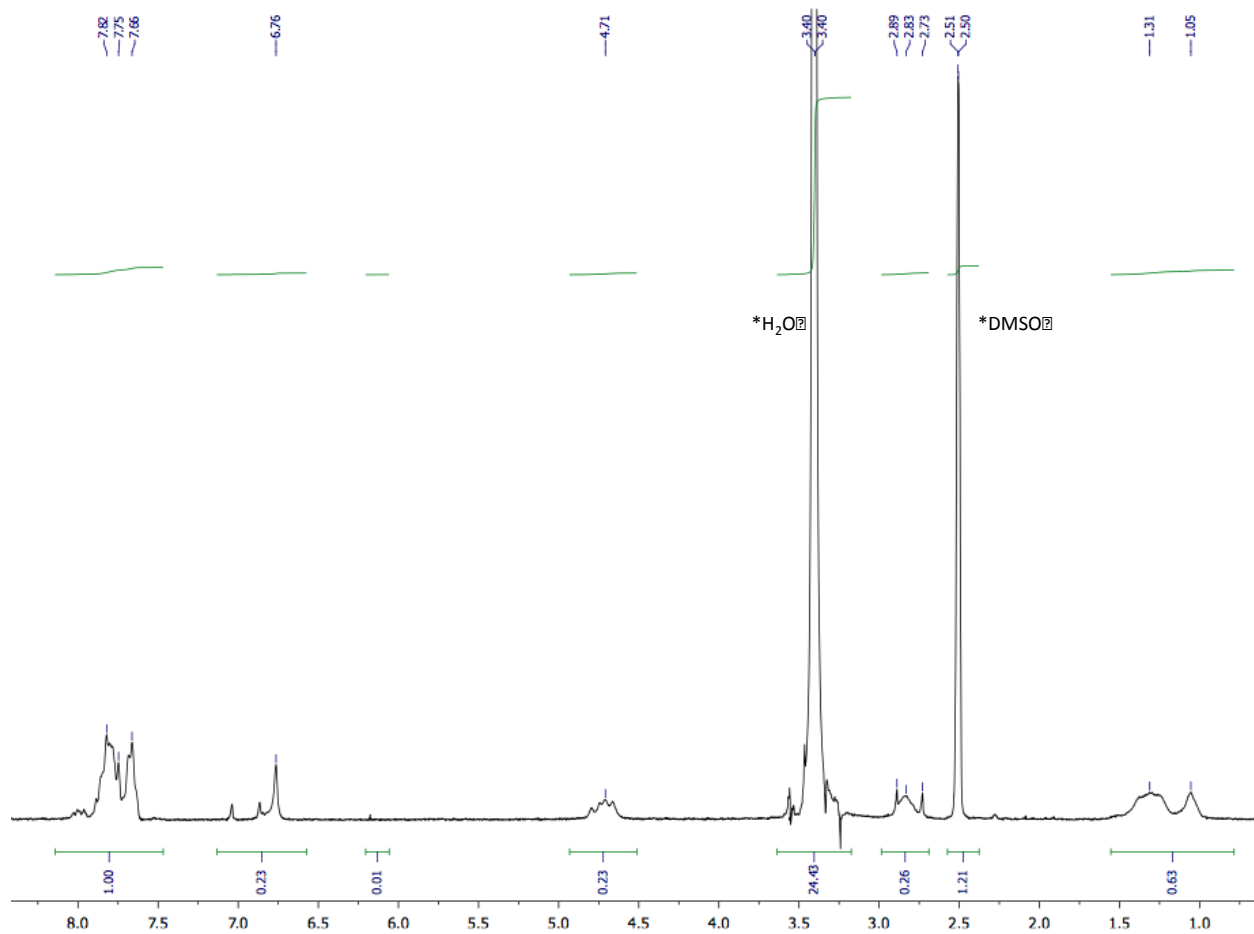

**Figure S6.** Proton NMR spectrum of **LX8** ((CD<sub>3</sub>)<sub>2</sub>SO, 300 MHz). Peak marked with an asterisk correspond to solvent signals.

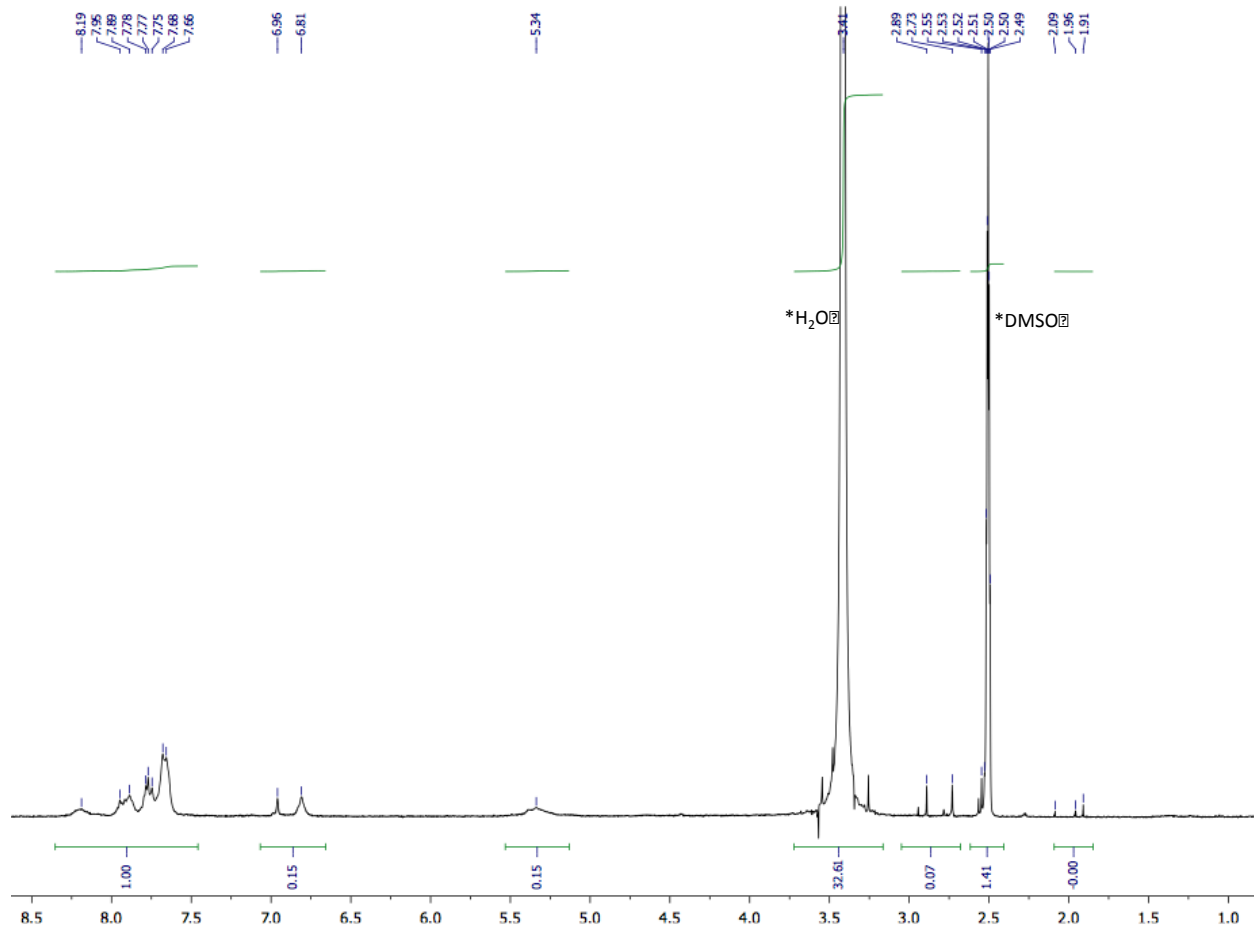

**Figure S7.** Proton NMR spectrum of **LXPh** ( $(\text{CD}_3)_2\text{SO}$ , 300 MHz). Peak marked with an asterisk correspond to solvent signals.



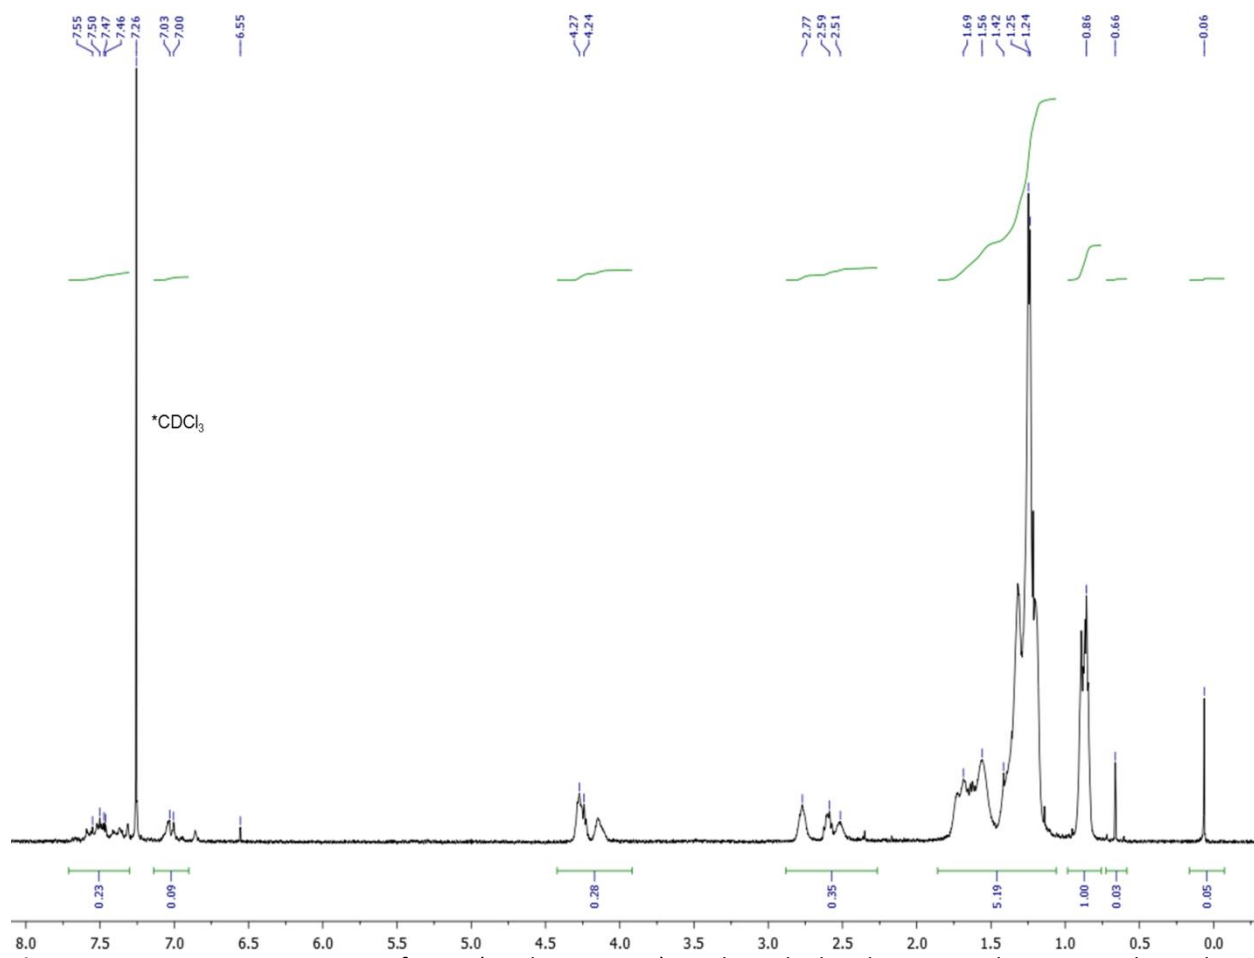

**Figure S8.** Proton NMR spectrum of **Pc12** (CDCl<sub>3</sub>, 300 MHz). Peak marked with an asterisk correspond to solvent signals.

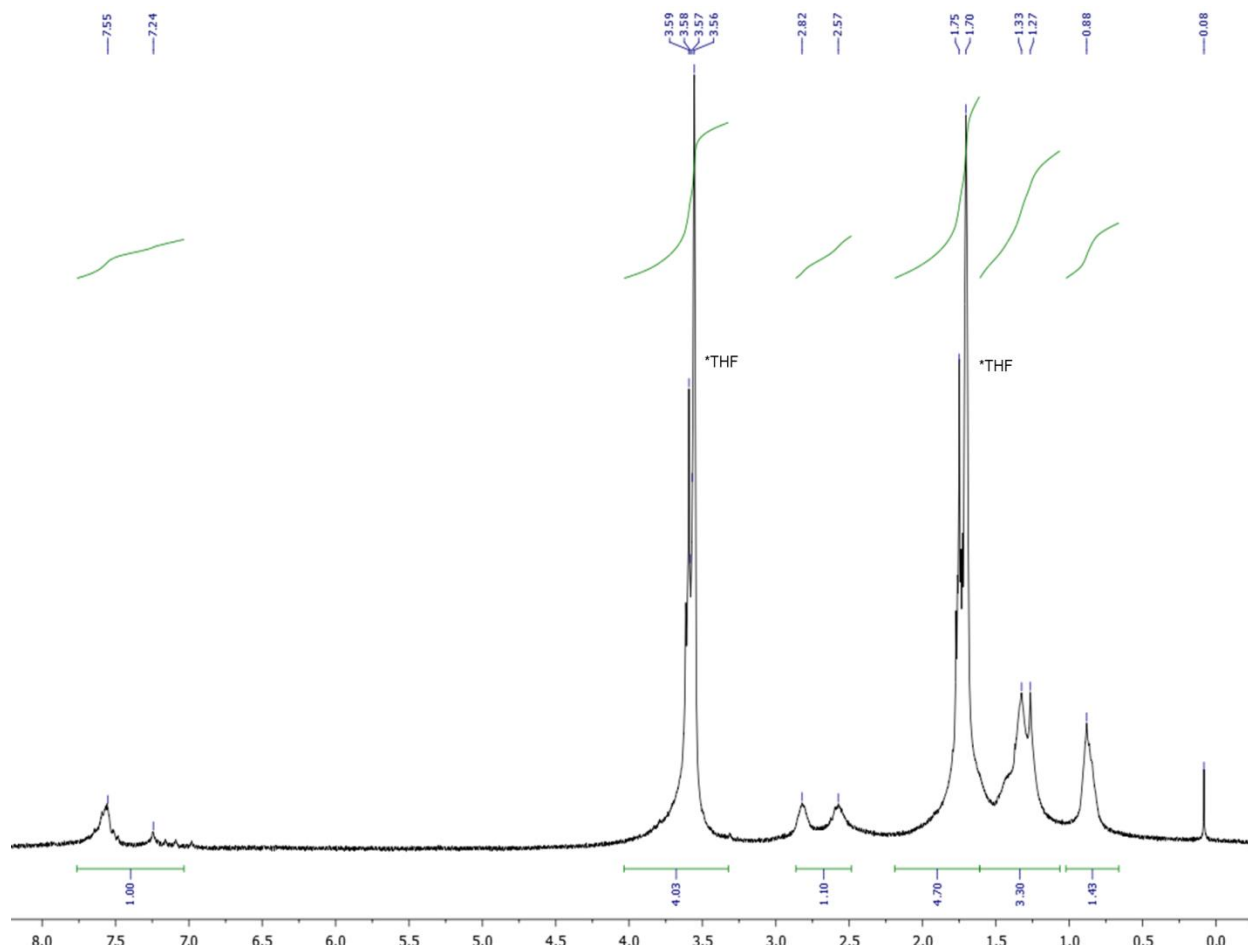

**Figure S9.** Proton NMR spectrum of **Pc12-100** (THF-d<sup>8</sup>, 300 MHz). Peak marked with an asterisk correspond to solvent signals.

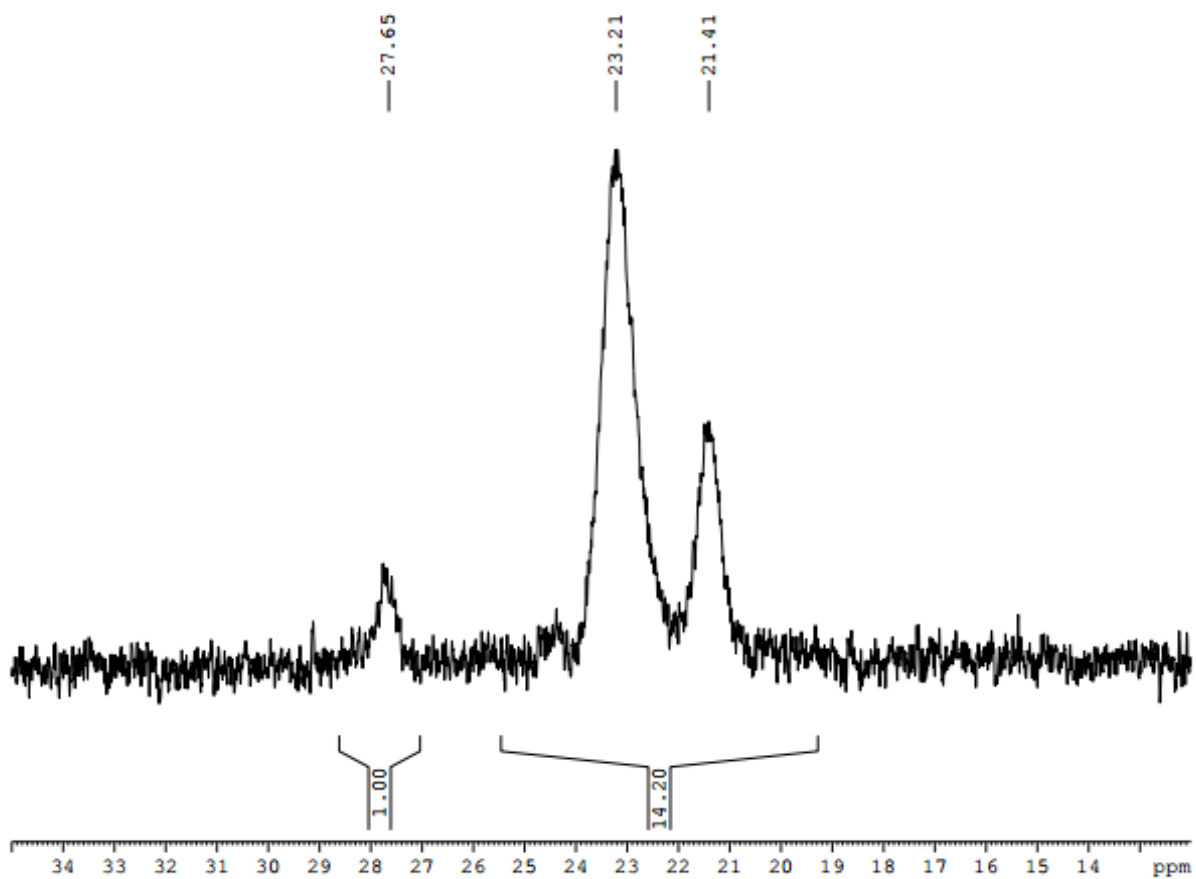

Figure **S10**. Phosphorous-31 NMR of compound **LX1** ( $(\text{CD}_3)_2\text{SO}$ , 121 MHz)

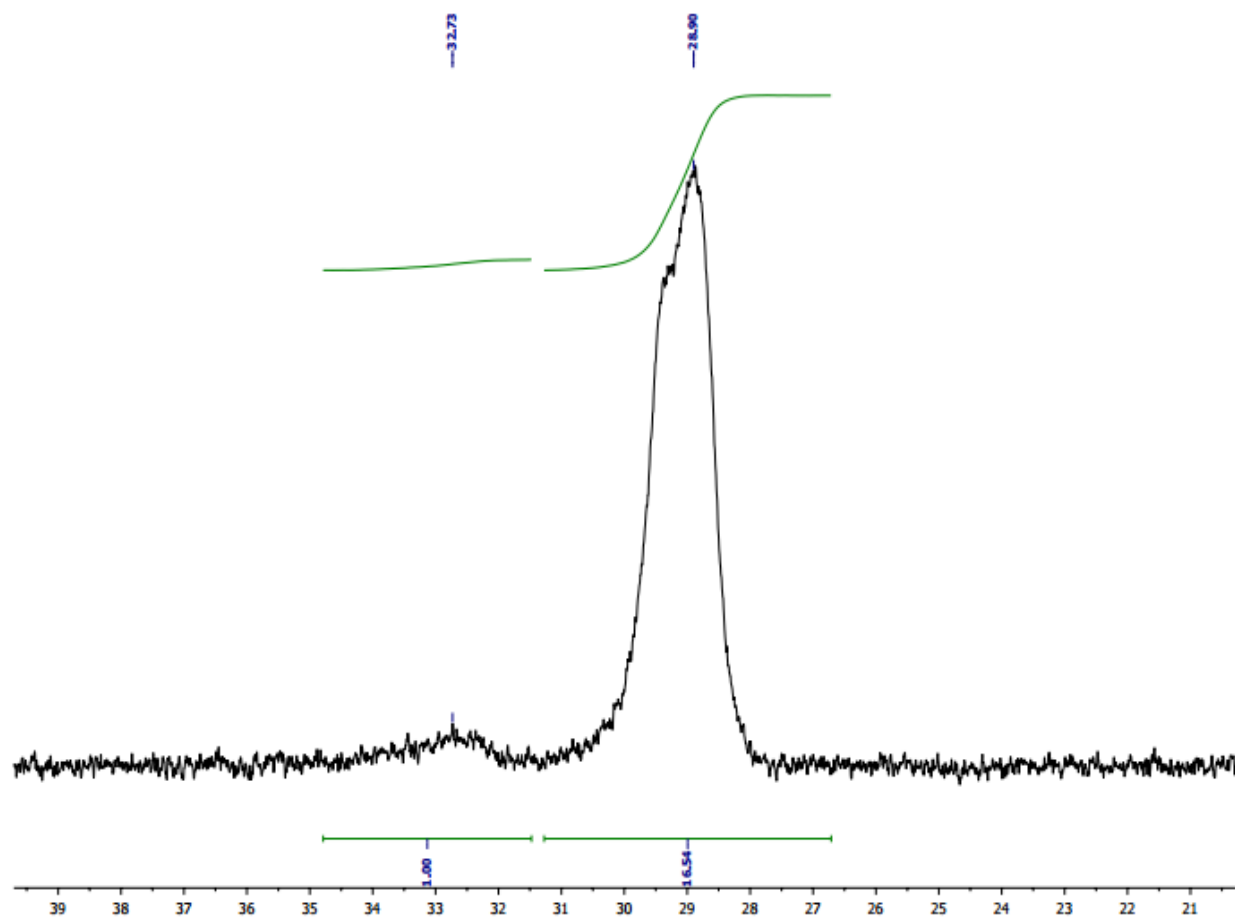

Figure S11. Phosphorous-31 NMR of compound **LX2** ( $(\text{CD}_3)_2\text{SO}$ , 121 MHz)

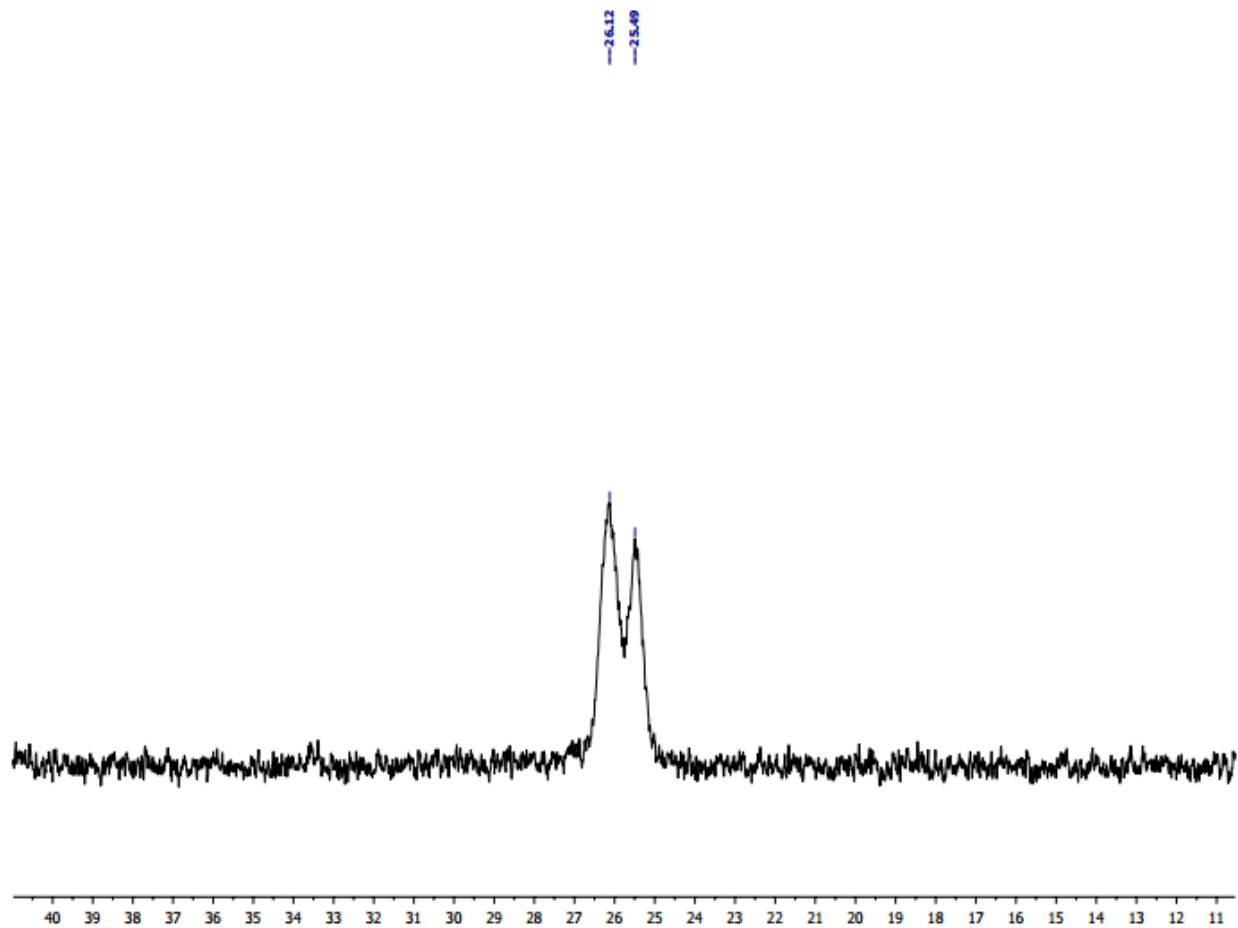

Figure **S12**. Phosphorous-31 NMR of compound **LX3** ( $(\text{CD}_3)_2\text{SO}$ , 121 MHz)

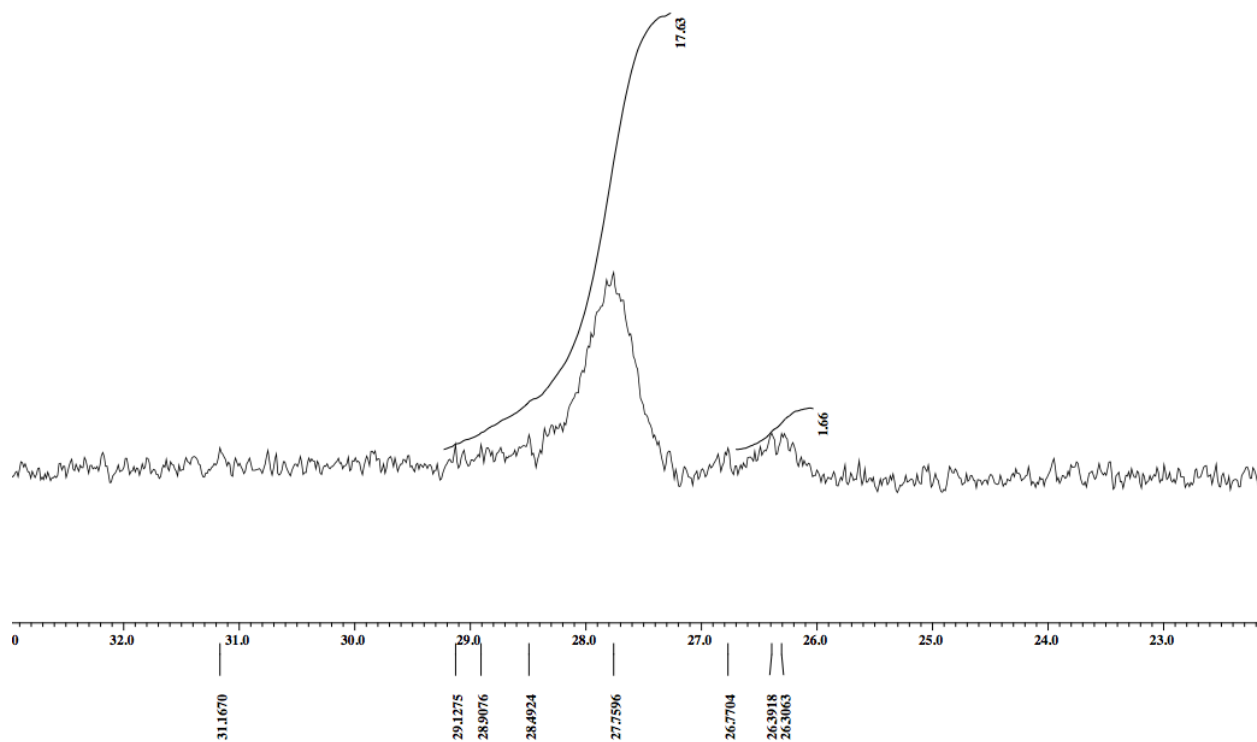

Figure S13. Phosphorous-31 NMR of compound LX4 ((CD<sub>3</sub>)<sub>2</sub>SO, 121 MHz)

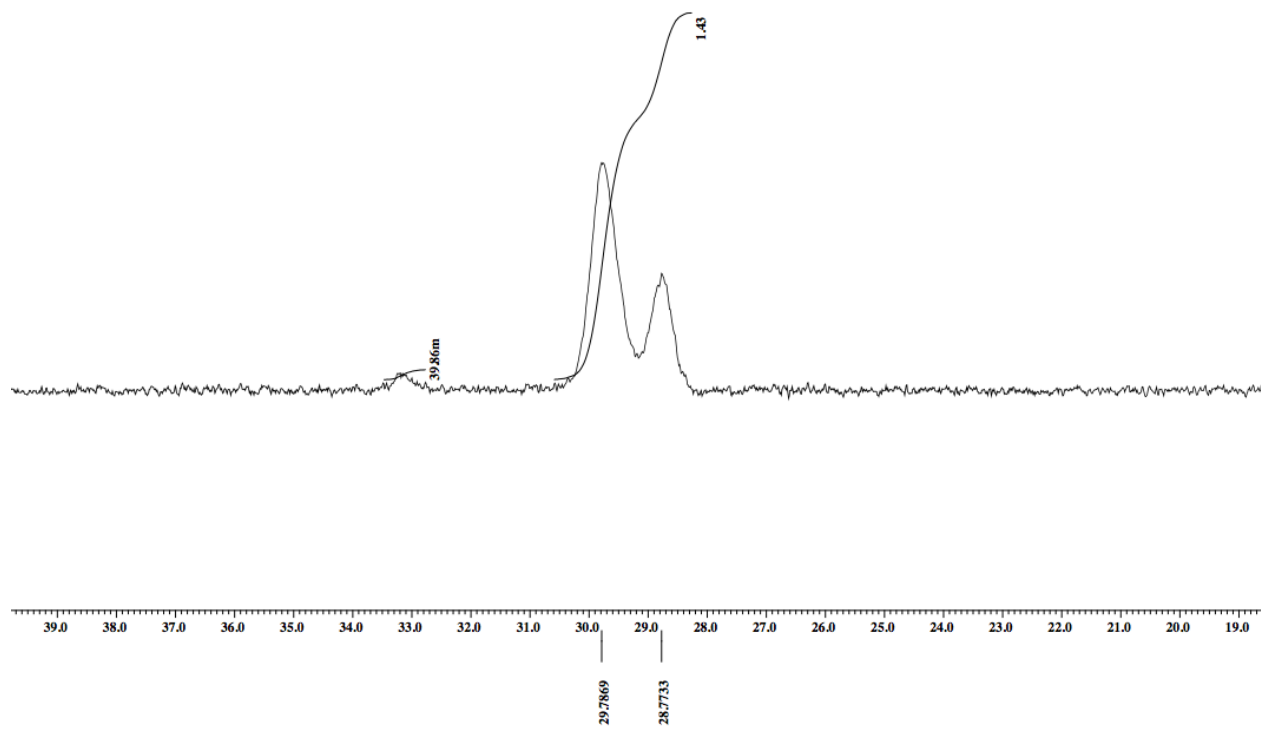

Figure S14. Phosphorous-31 NMR of compound LX5 ( $(\text{CD}_3)_2\text{SO}$ , 121 MHz)

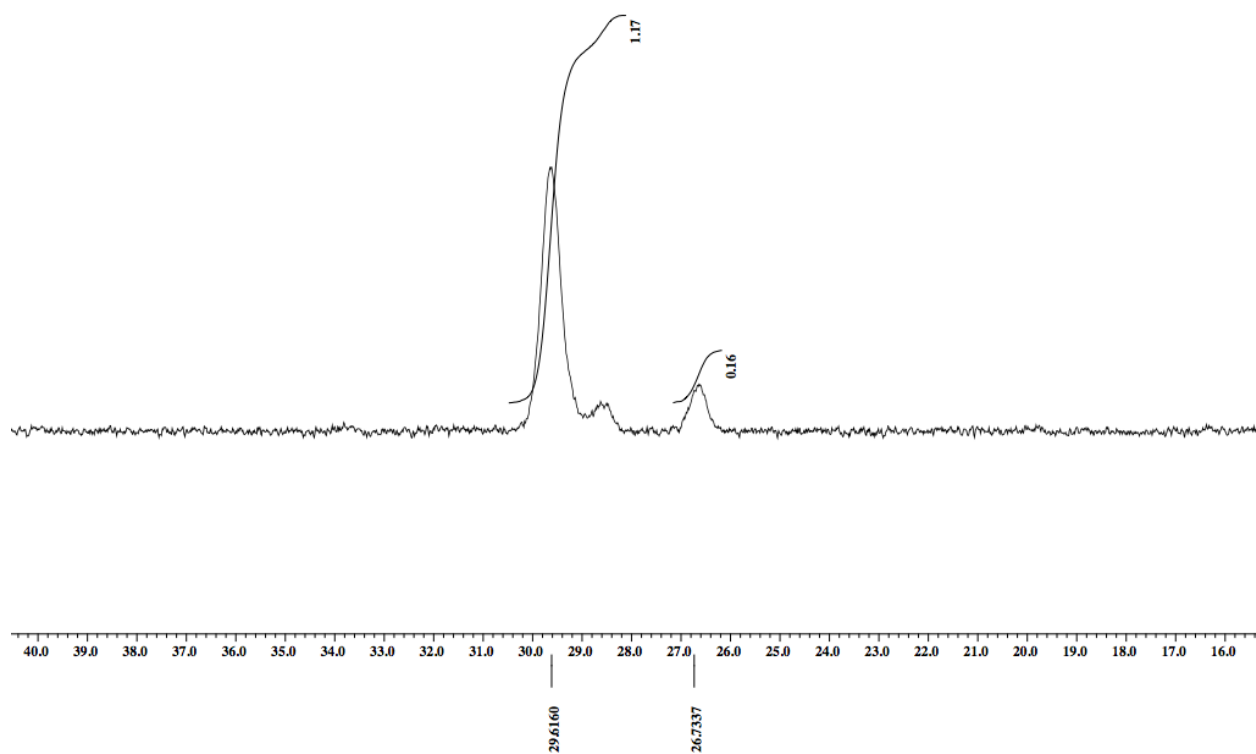

Figure **S15**. Phosphorous-31 NMR of compound **LX8** ( $(\text{CD}_3)_2\text{SO}$ , 121 MHz)



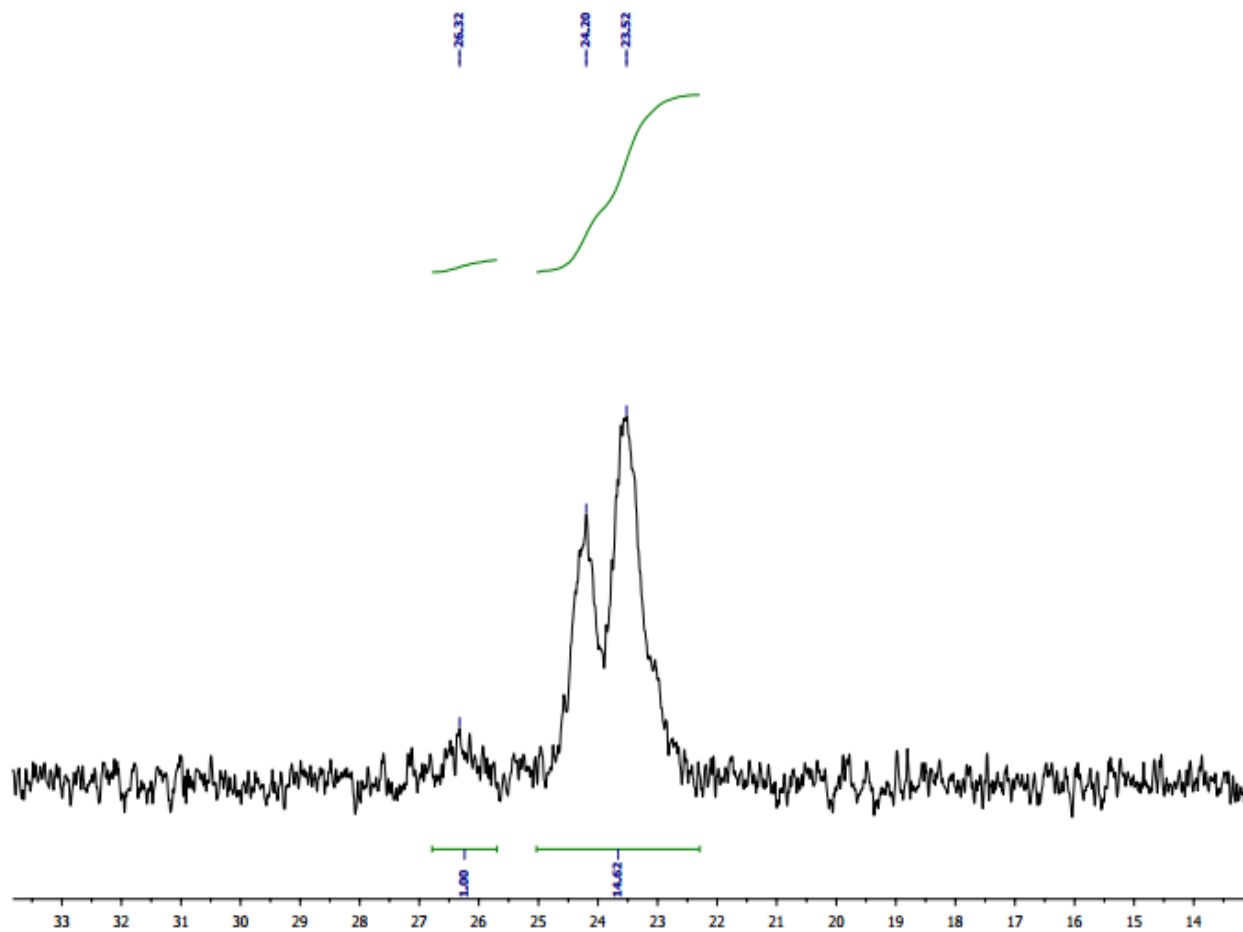

Figure S16. Phosphorous-31 NMR of compound LXPh ( $(\text{CD}_3)_2\text{SO}$ , 121 MHz)

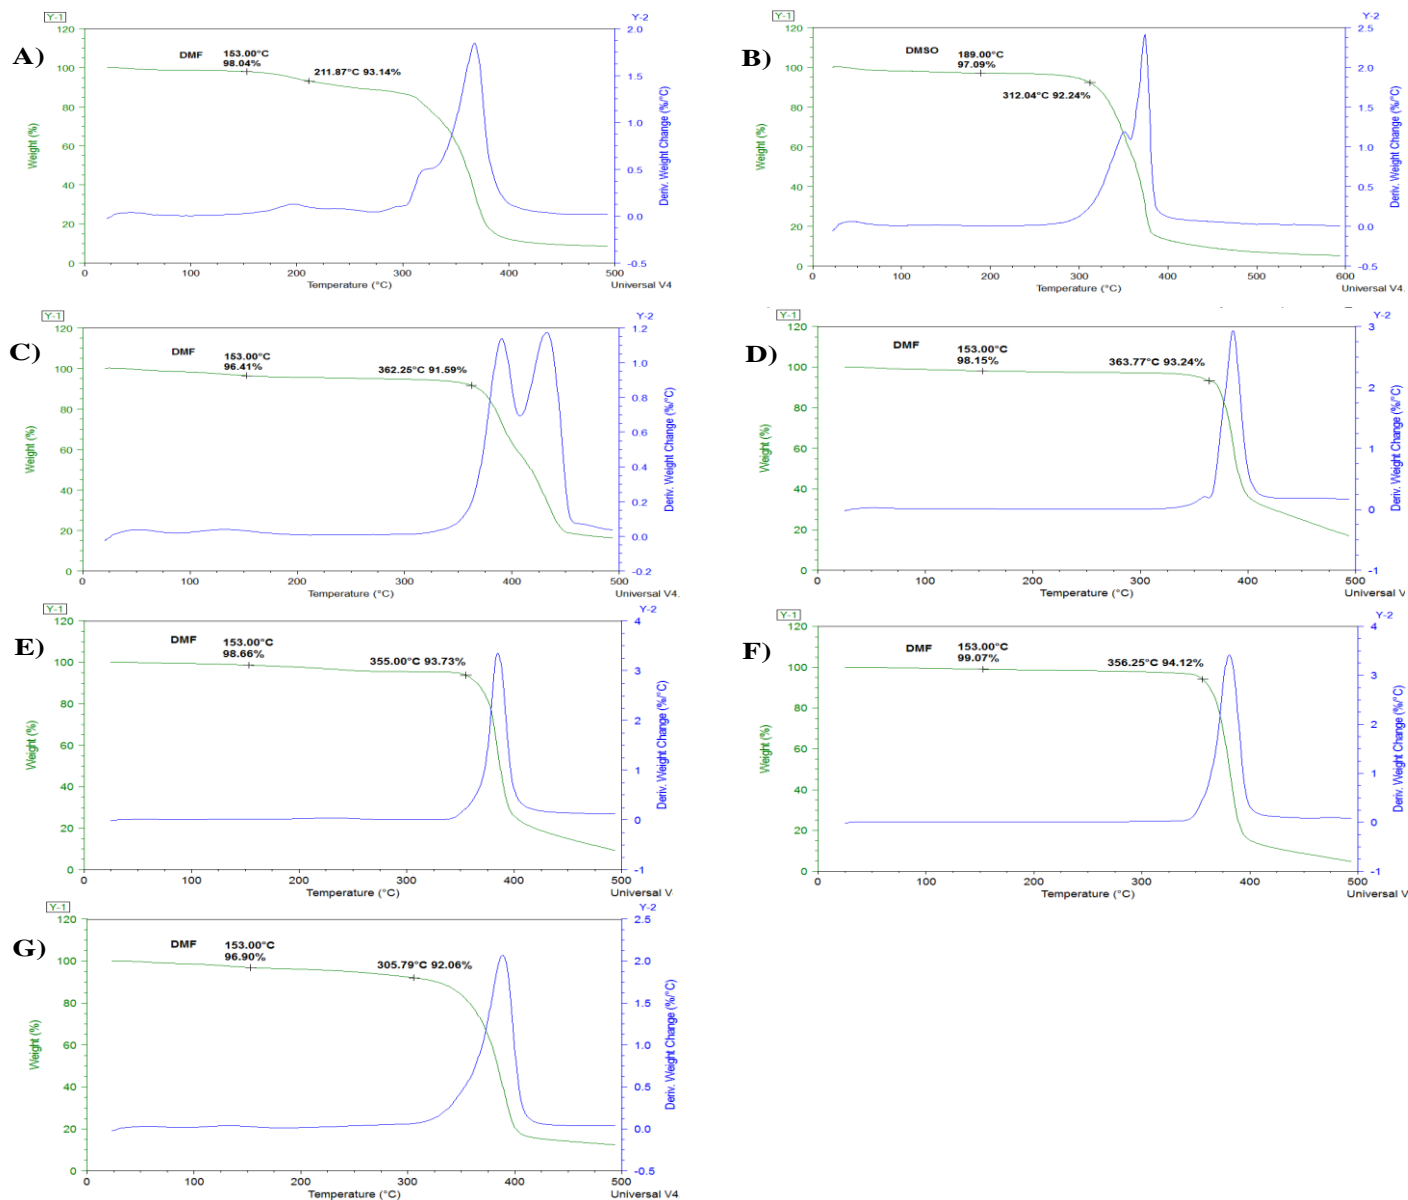

Figure S17. TGA of LX polymers: LX1 (A), LX2 (B), LX3 (C), LX4 (D), LX5 (E), LX8 (F) and LXPh (G).

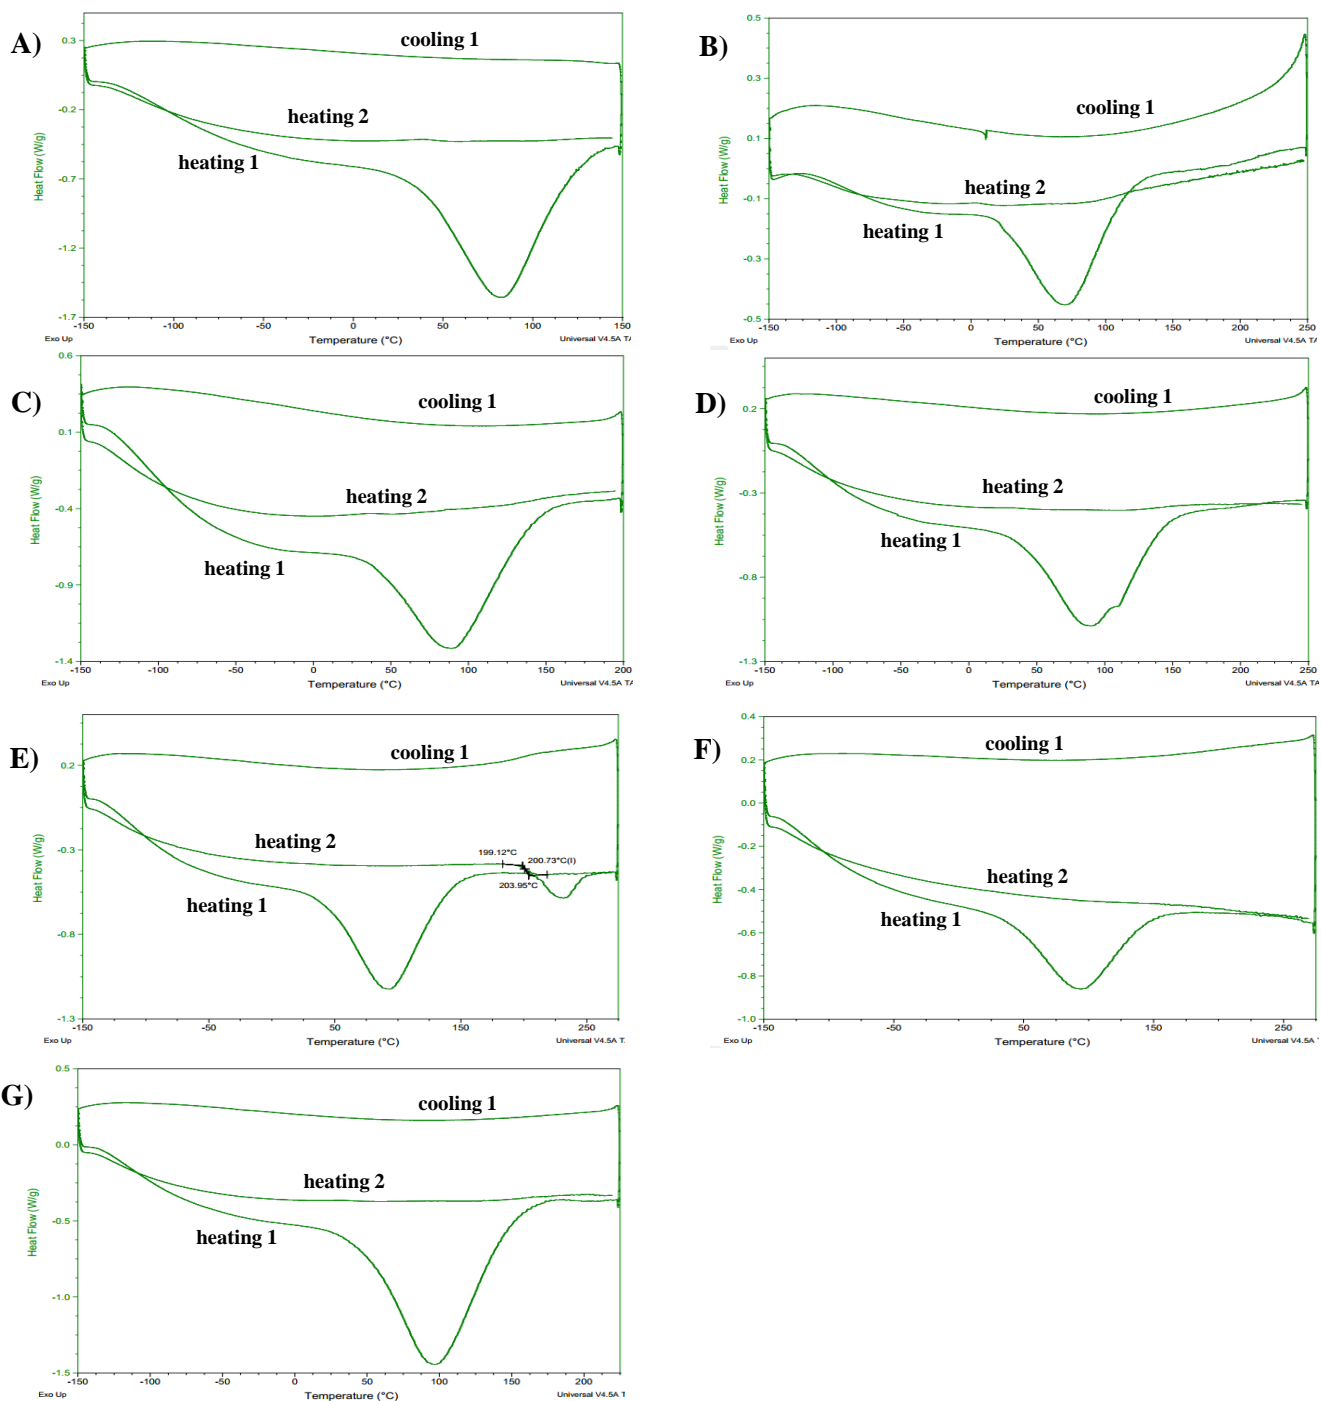

Figure S18. DSC of LX polymers: LX1 (A), LX2 (B), LX3 (C), LX4 (D), LX5 (E), LX8 (F) and LXPh (G).

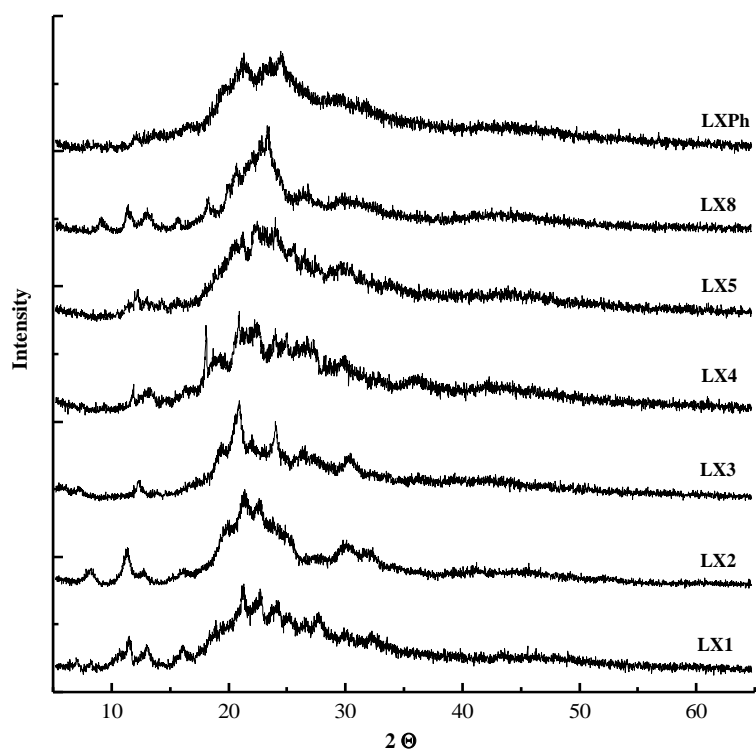

Figure S19. X-ray Powder Diffraction of polymers.

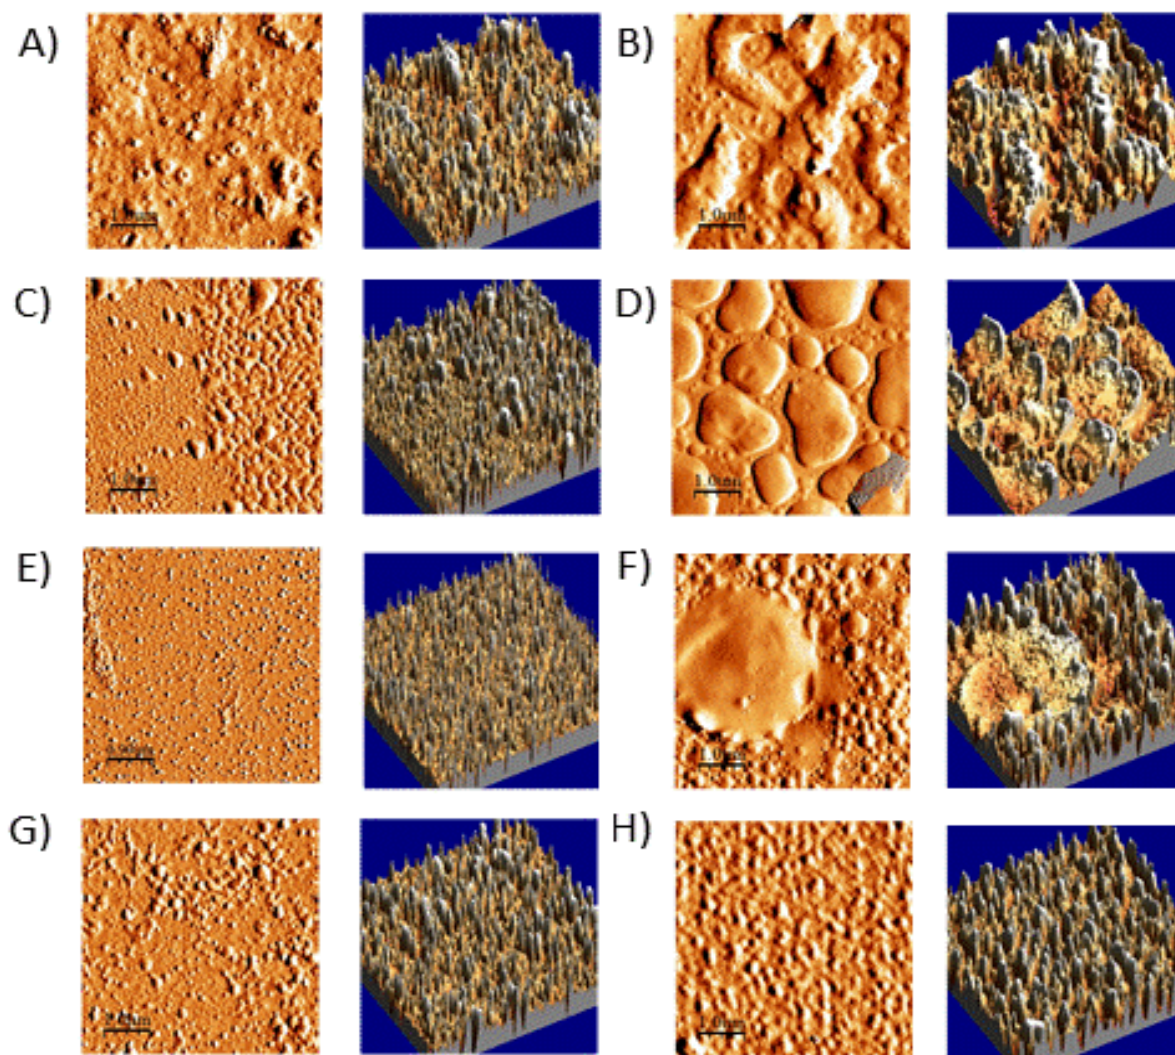

Figure S20. AFM (5×5 μm) 2D height images and 3D images of LbL films of LX with Pc12-100: LX1/Pc12-100 (A), LX2/Pc12-100 (B), LX3/Pc12-100 (C), LX4/Pc12-100 (D), LX5/Pc12-100 (E), LX8/Pc12-100 (F) and LXPh/Pc12-100 (G) and clean glass slide (H).

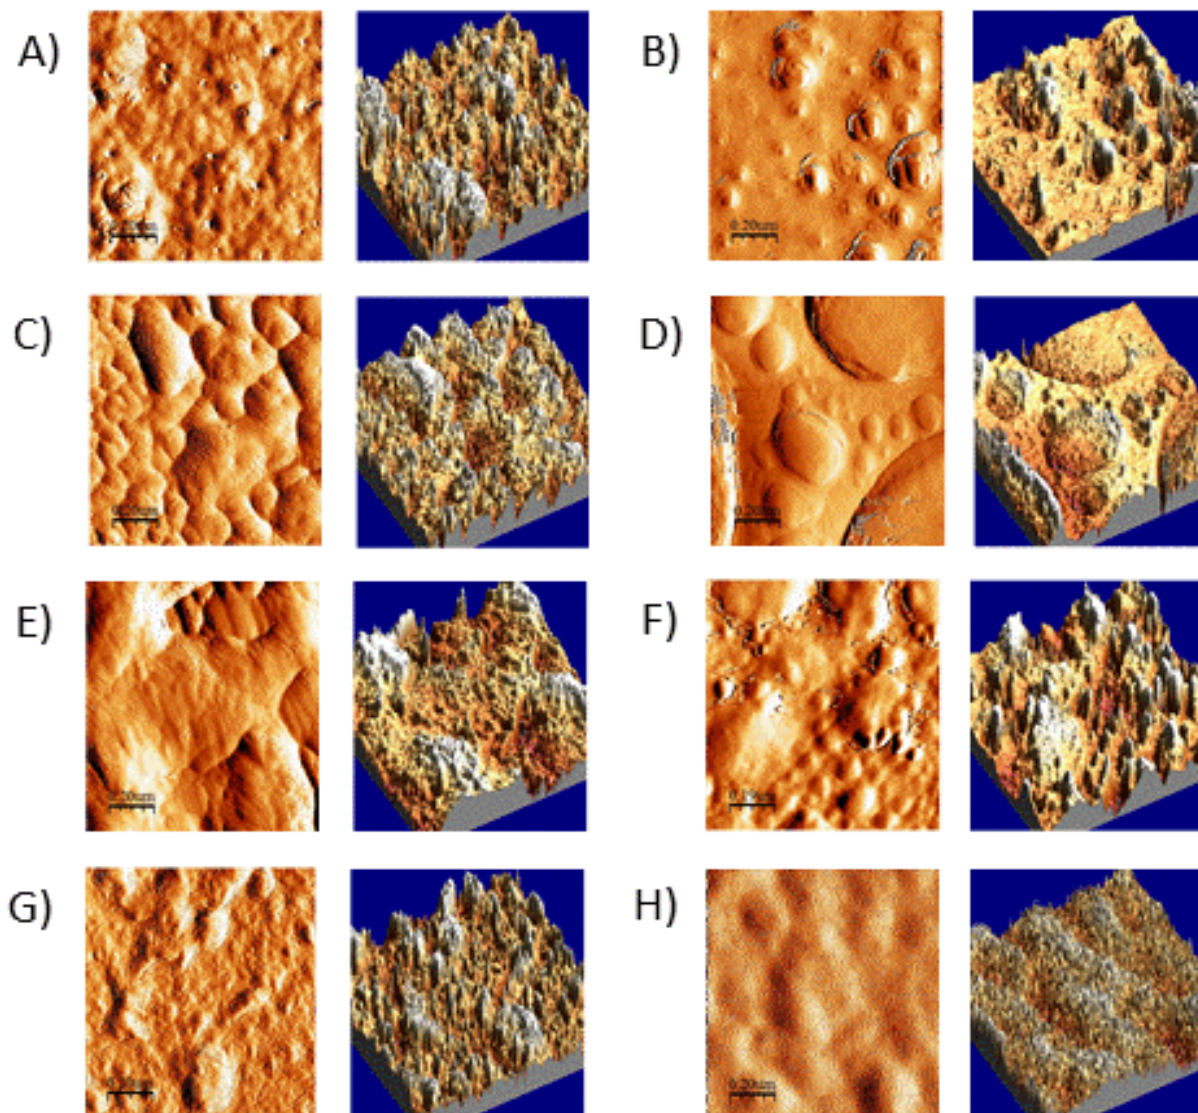

Figure 21. AFM ( $1 \times 1 \mu\text{m}$ ) 2D height images and 3D images of LbL films of LX with Pc12-100: LX1/Pc12-100 (A), LX2/Pc12-100 (B), LX3/Pc12-100 (C), LX4/Pc12-100 (D), LX5/Pc12-100 (E), LX8/Pc12-100 (F) and LXPh/Pc12-100 (G) and clean glass slide (H).
